# Supplementary material for: Forest Restoration at Berenty Reserve, Southern Madagascar: A Pilot Study of Tree Growth Following the Framework Species Method
Source: MDPI journal article supplement (doi:10.3390/land10101041), 2021-10-02

## Supplementary

Figure S1a, b, c: maps of the three plots showing seedling numbering, existing trees and mortality 2016-2018

a)

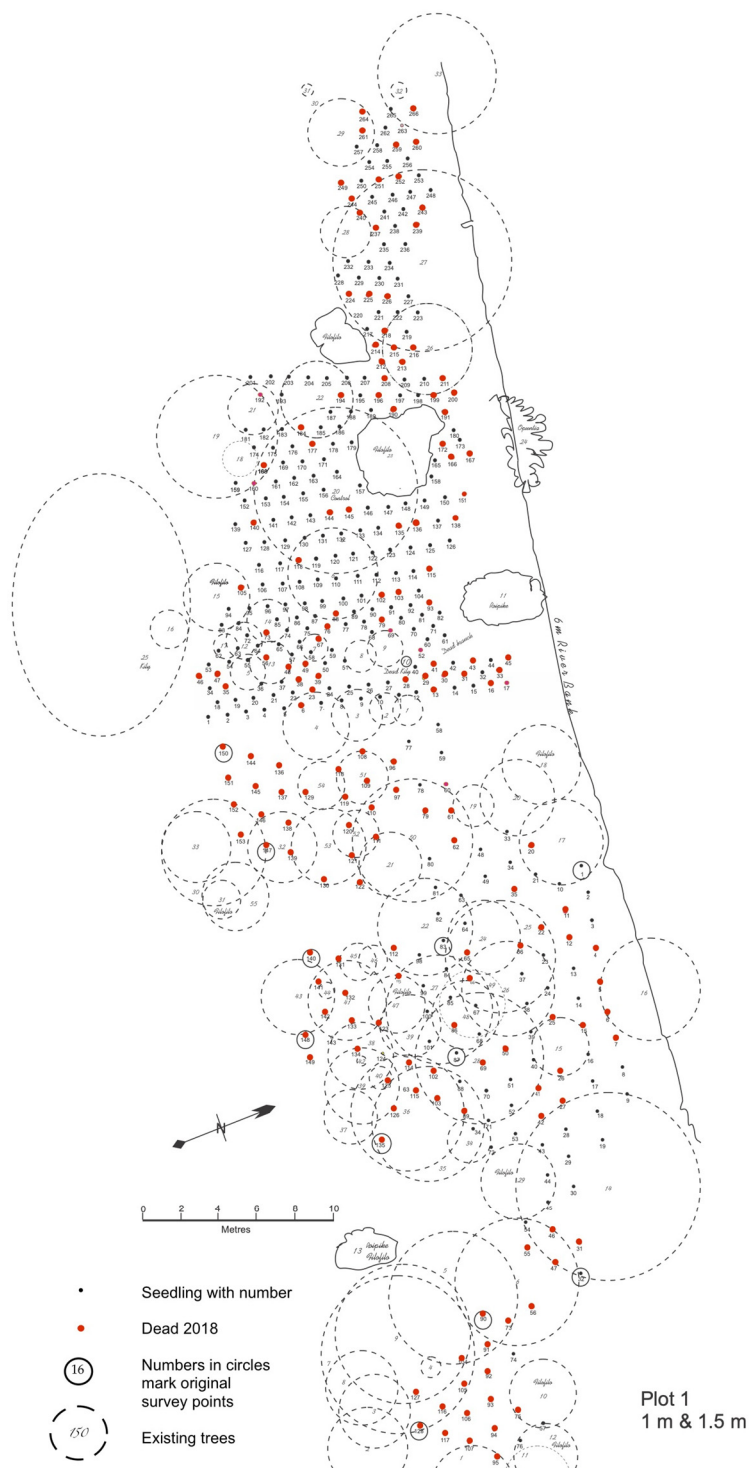

b)

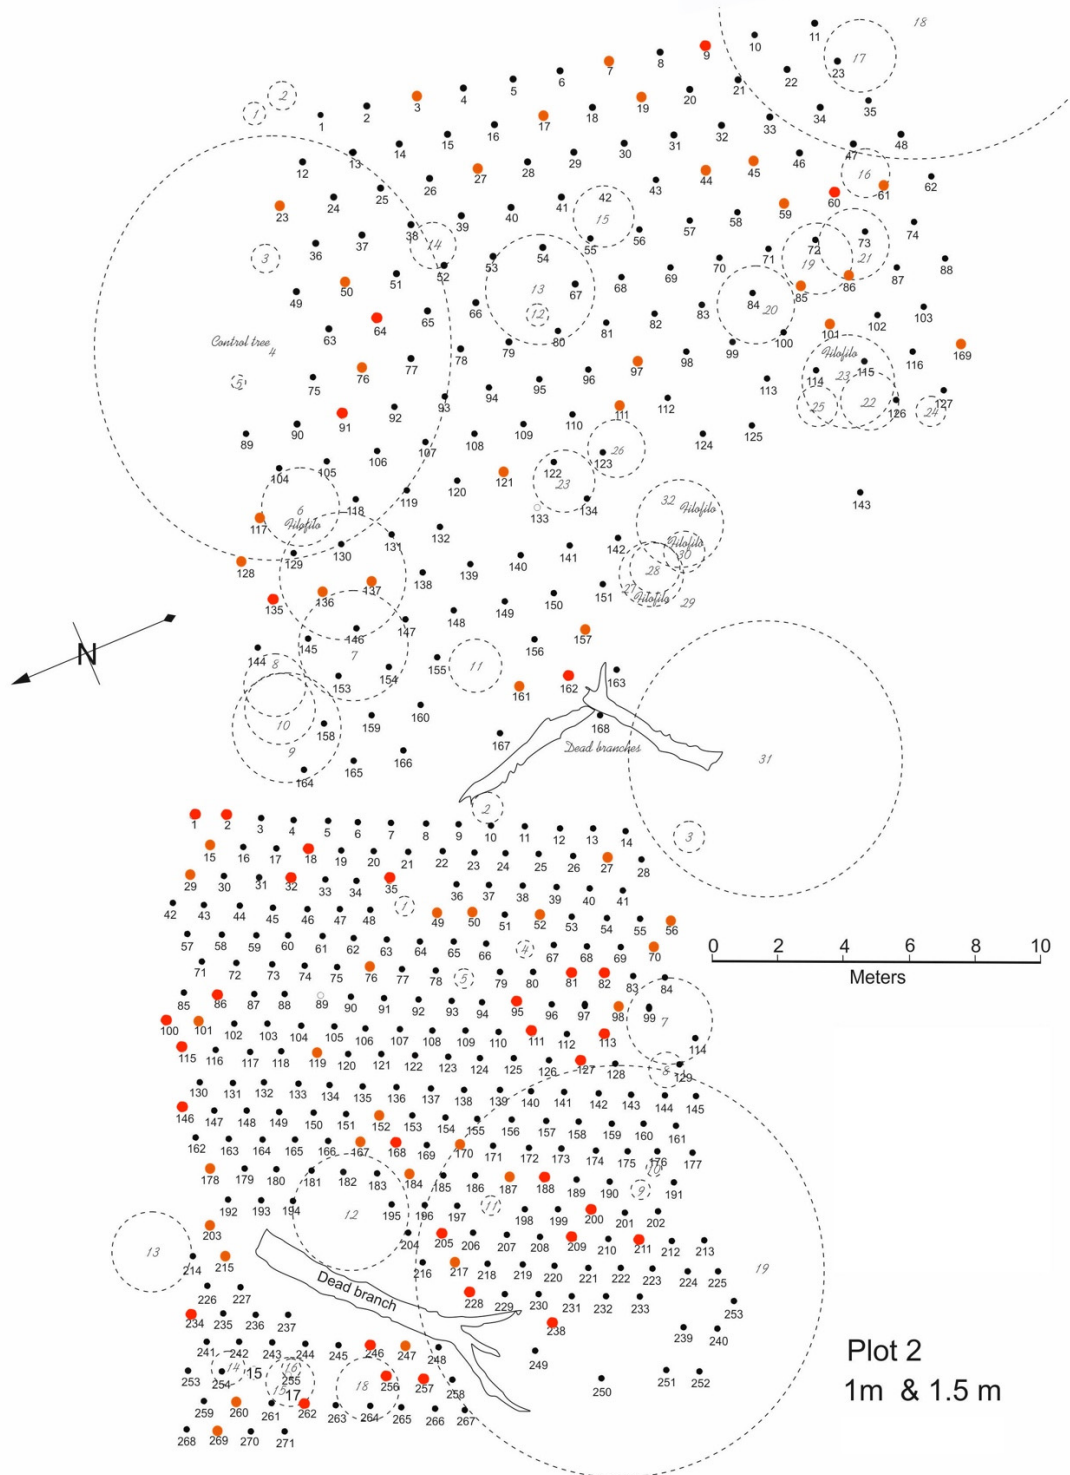

c)

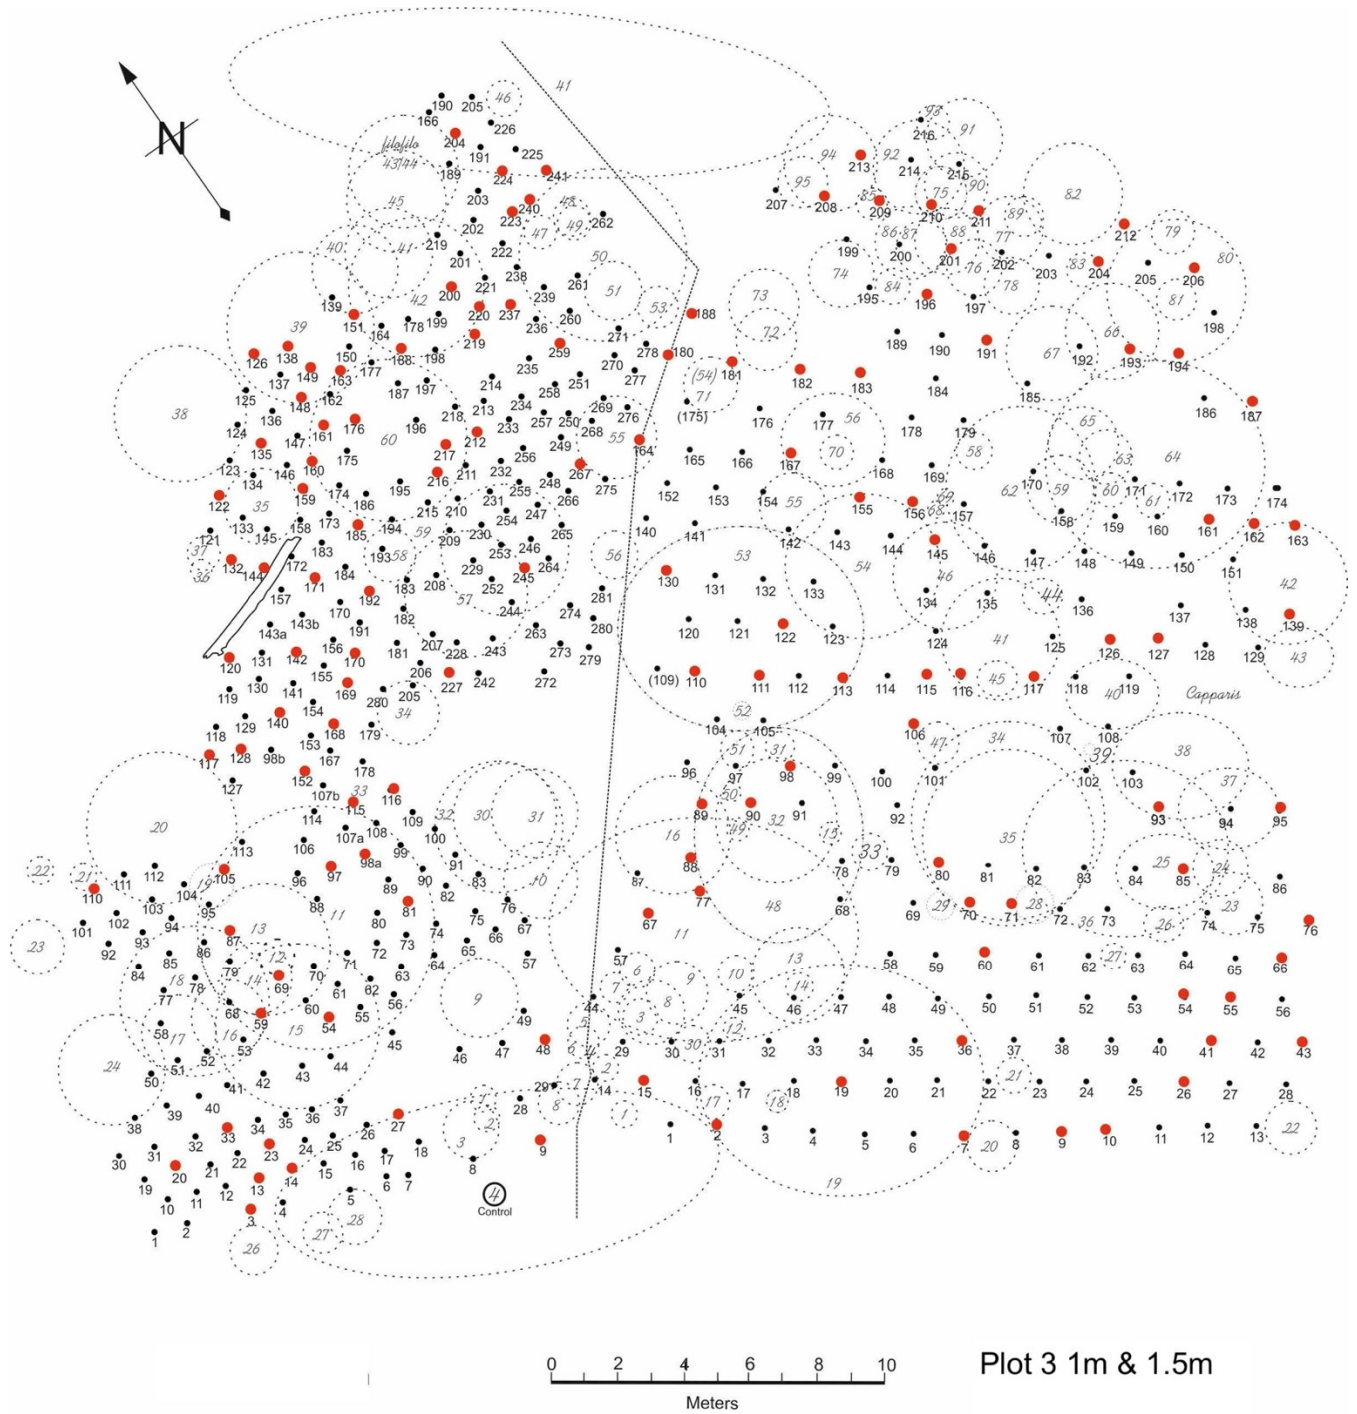

Supplement: s1 [file s1]
