# Supplementary material for: Forest Restoration at Berenty Reserve, Southern Madagascar: A Pilot Study of Tree Growth Following the Framework Species Method
Source: MDPI journal article supplement (doi:10.3390/land10101041), 2021-10-02
Supplement: s1 [file s1]

Archive with 1 entries (1 files):
- land-1388166-supplementary.pdf
